# Supplementary material
Source: PubMed Central journal article supplement (PMC3735445)
Supplement: NIHMS500153-supplement-Supplementary_Fig__S1-S6__Table__S1-S2.pdf [file NIHMS500153-supplement-Supplementary_Fig__S1-S6__Table__S1-S2.pdf]

Supplementary Materials for  
**Tyrosine Kinase BMX Phosphorylates Phosphotyrosine-Primed Motif  
Mediating the Activation of Multiple Receptor Tyrosine Kinases**

Sen Chen, Xinnong Jiang, Christina A. Gewinner, John M. Asara, Nicholas I. Simon,  
Changmeng Cai, Lewis C. Cantley, Steven P. Balk\*

\*Corresponding author. E-mail: sbalk@bidmc.harvard.edu

Published 28 May 2013, *Sci. Signal.* **6**, ra40 (2013)  
DOI: 10.1126/scisignal.2003936

**The PDF file includes:**

Fig. S1. In vitro kinase reactions on purified 3XFlag-tagged wild-type and kinase-deficient BMX.

Fig. S2. Peptide array images of phosphorylation by wild-type BMX.

Fig. S3. MS results for FAK tyrosine phosphorylation.

Fig. S4. Genotyping of MEFs from embryos derived from *Bmx*<sup>-</sup> and *Bmx*<sup>+/-</sup> breeding.

Fig. S5. Immunofluorescence for BMX and pTyr<sup>576/577</sup> FAK in BMX-transfected COS7 cells.

Fig. S6. BMX knockdown impairs wound healing in LNCaP cells.

Table S1. BMX matrix for pTyr at the -1 position.

Table S2. List of proteins with dual tyrosine (pYpY) phosphorylation.

## Supplementary Materials

Figure S1

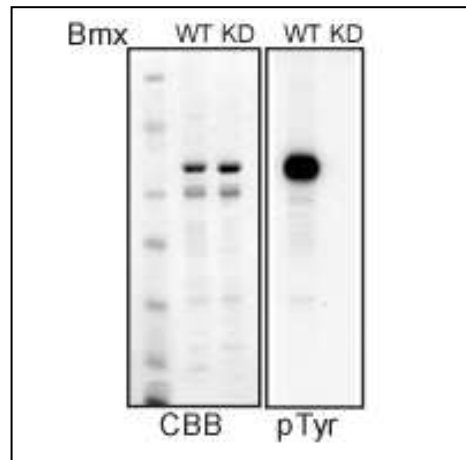

**Figure S1. In vitro kinase reactions on purified 3XFlag-tagged wild-type and kinase-deficient BMX.**

Left panel, Coomassie Brilliant Blue (CBB) staining; right panel, Western blot for phosphorylated Tyr (pTyr) after an in vitro kinase assay in LNCaP cells overexpressing wild-type (WT) or kinase-deficient (KD) Bmx.

**Figure S2**

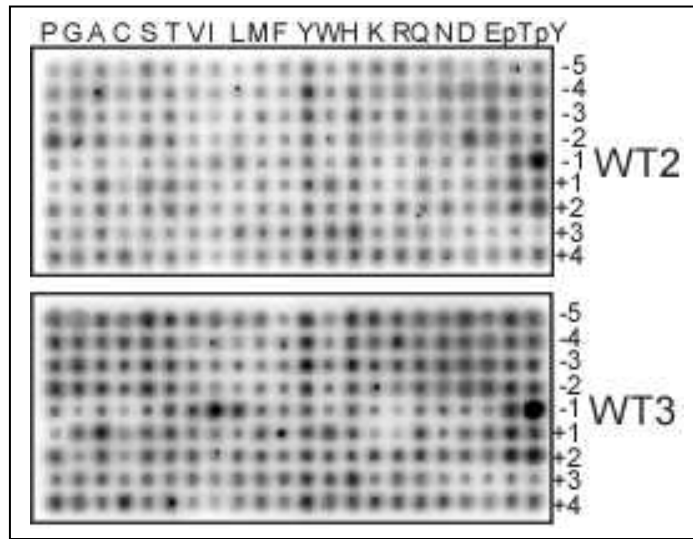

**Figure S2. Peptide array images of phosphorylation by wild-type BMX.** In vitro kinase assays on biotinylated peptide libraries were performed with wild-type (WT) or kinase-deficient BMX. Images are from two independent assays performed with wild-type BMX additional to that shown in Fig. 1B.

Figure S3

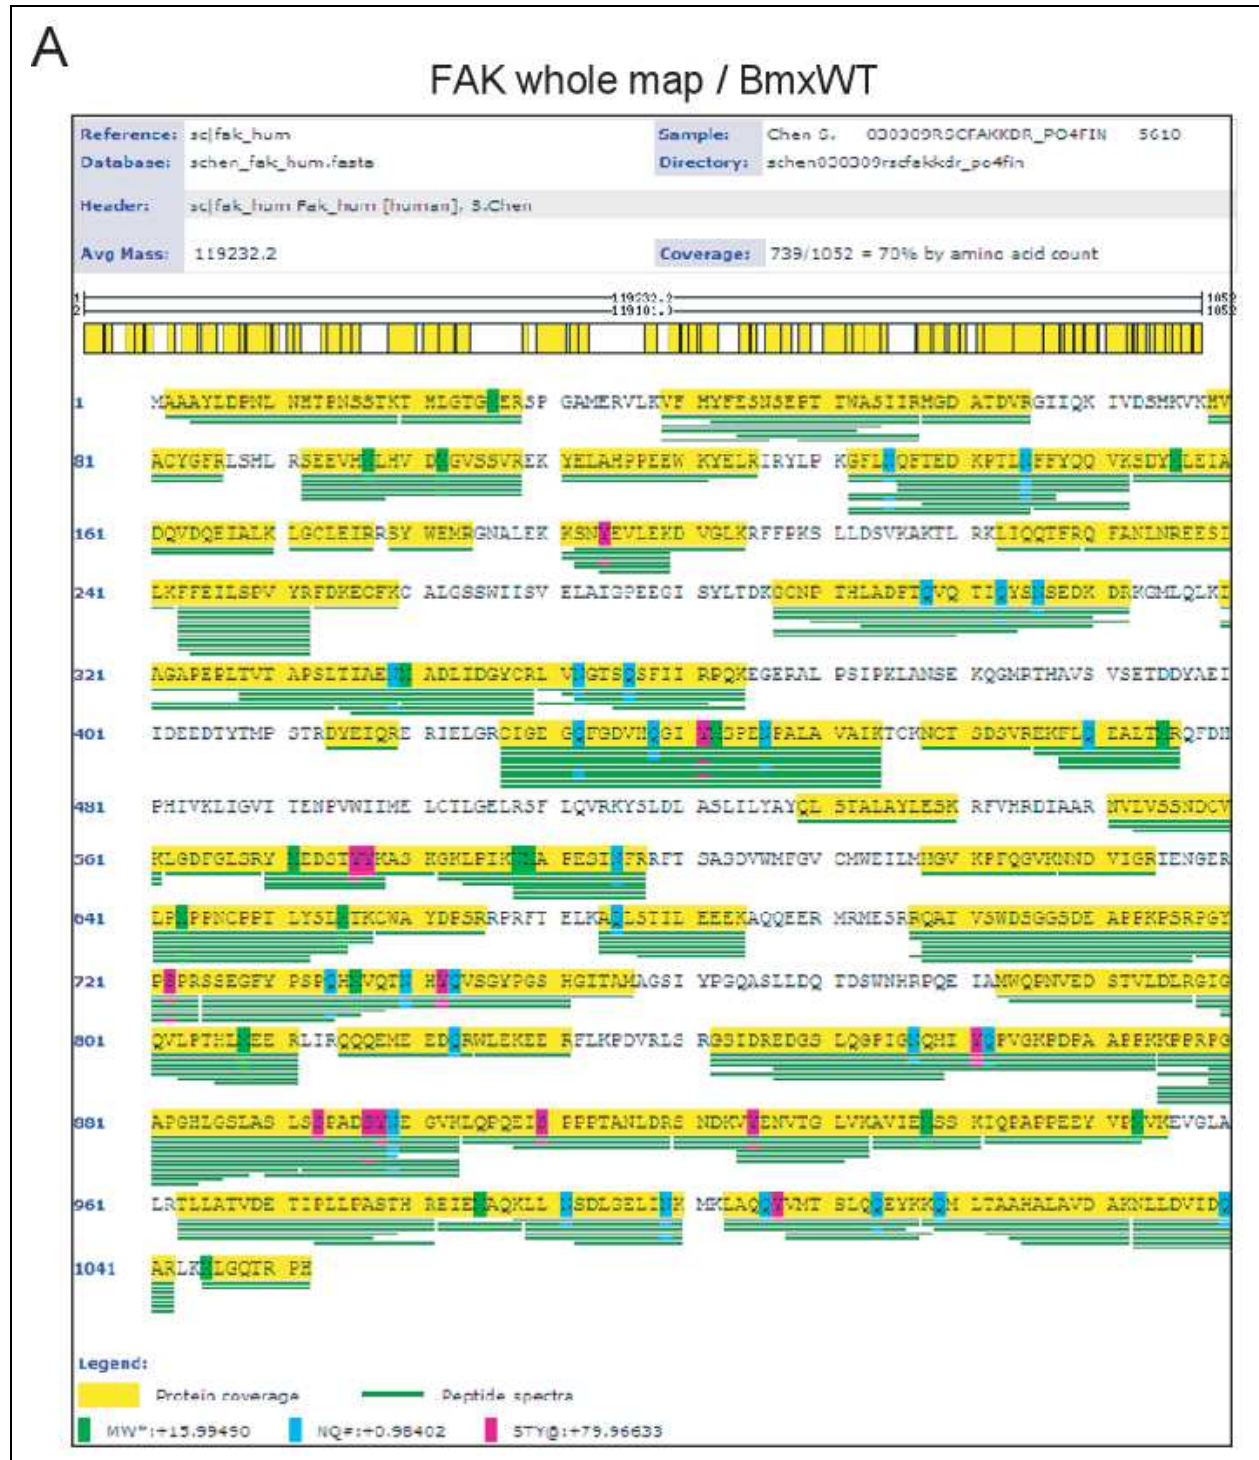

**B****FAK whole map / BmxKD**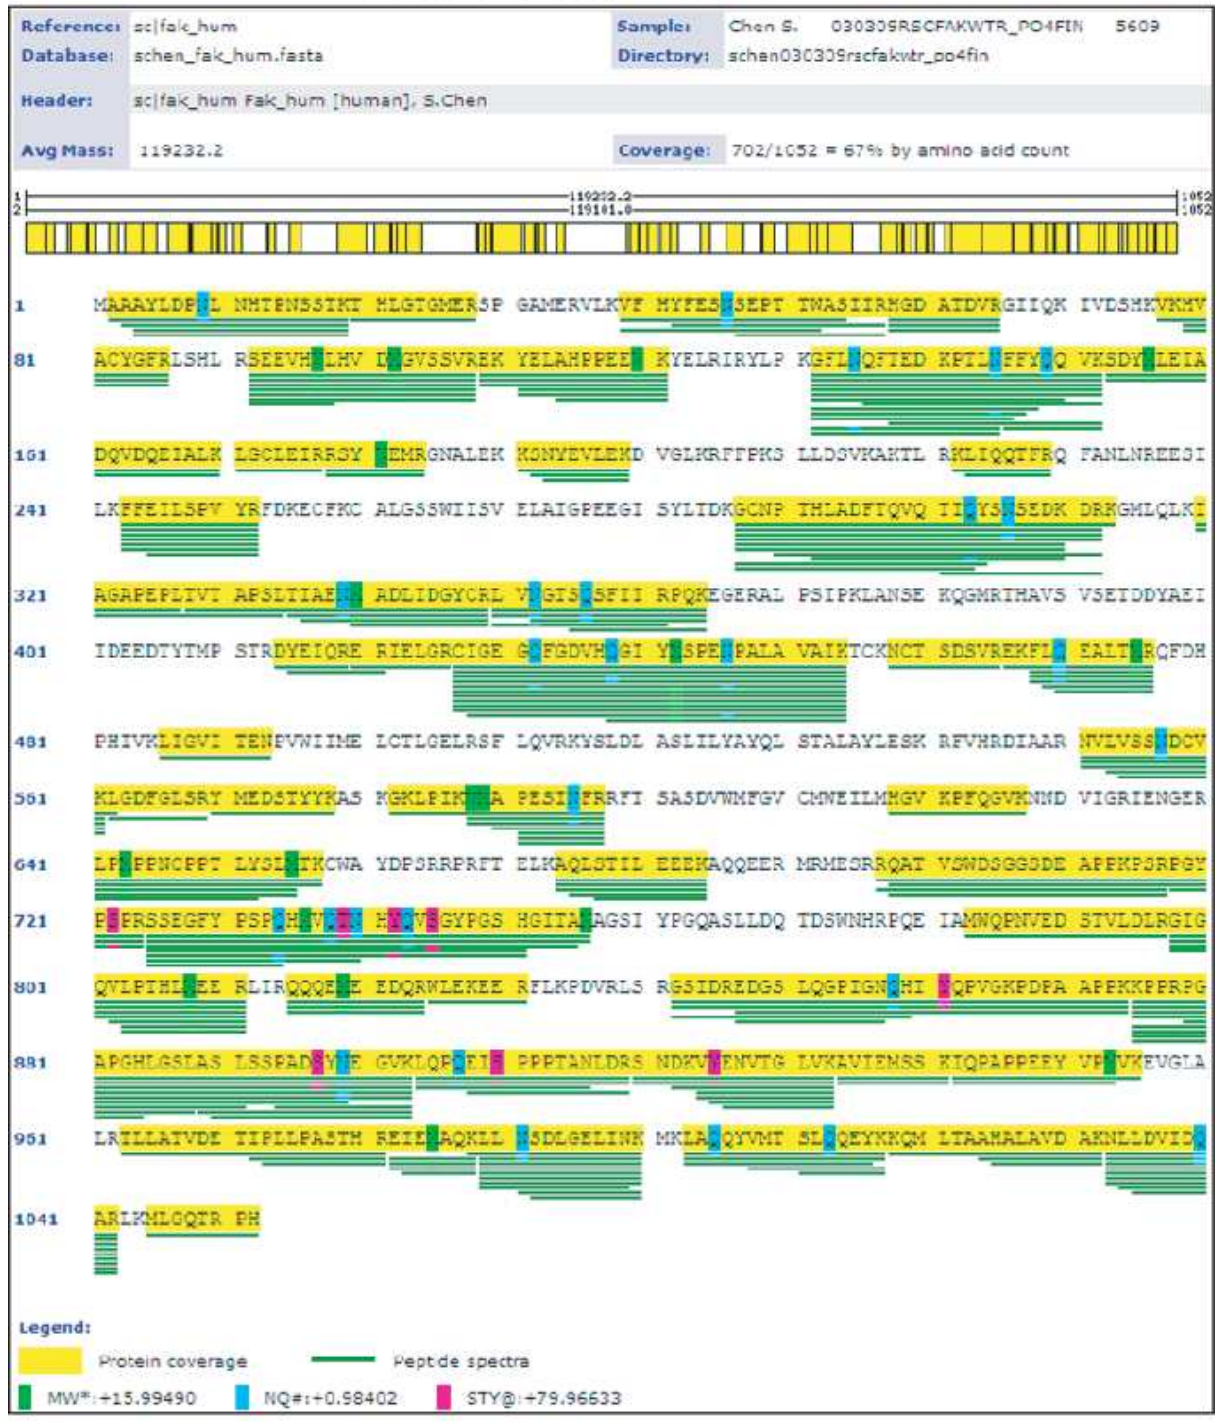

**Figure 3. MS results for FAK tyrosine phosphorylation.** Phosphopeptide maps for SRC-induced phosphorylated FAK after in vitro kinase reactions with wild-type BMX (BmxWT; A) or kinase-deficient BMX (BmxKD; B). Note that pTyr<sup>576</sup> was not found in (B) due to limited peptide coverage.

**Figure S4**

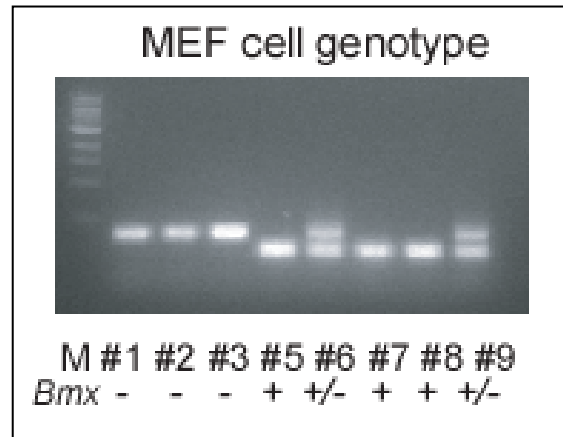

**Figure S4. Genotyping of MEFs from embryos derived from  $Bmx^-$  and  $Bmx^{+/-}$  breeding.** Male littermates that were wild-type for  $Bmx$  ( $Bmx^+$ ) or  $Bmx$  negative ( $Bmx^-$ ), and females that were heterozygous for  $Bmx$  ( $Bmx^{+/-}$ ) were identified by genotyping and used to generate short-term MEF lines.  $Bmx$  is on the X chromosome, hence the single allele in male mice. MEFs #5, #7 and #8 were  $Bmx^+$  (+), MEFs #1, #2 and #3 were  $Bmx^-$  (-), and MEFs #6 and #9 were  $Bmx^{+/-}$ .

Figure S5

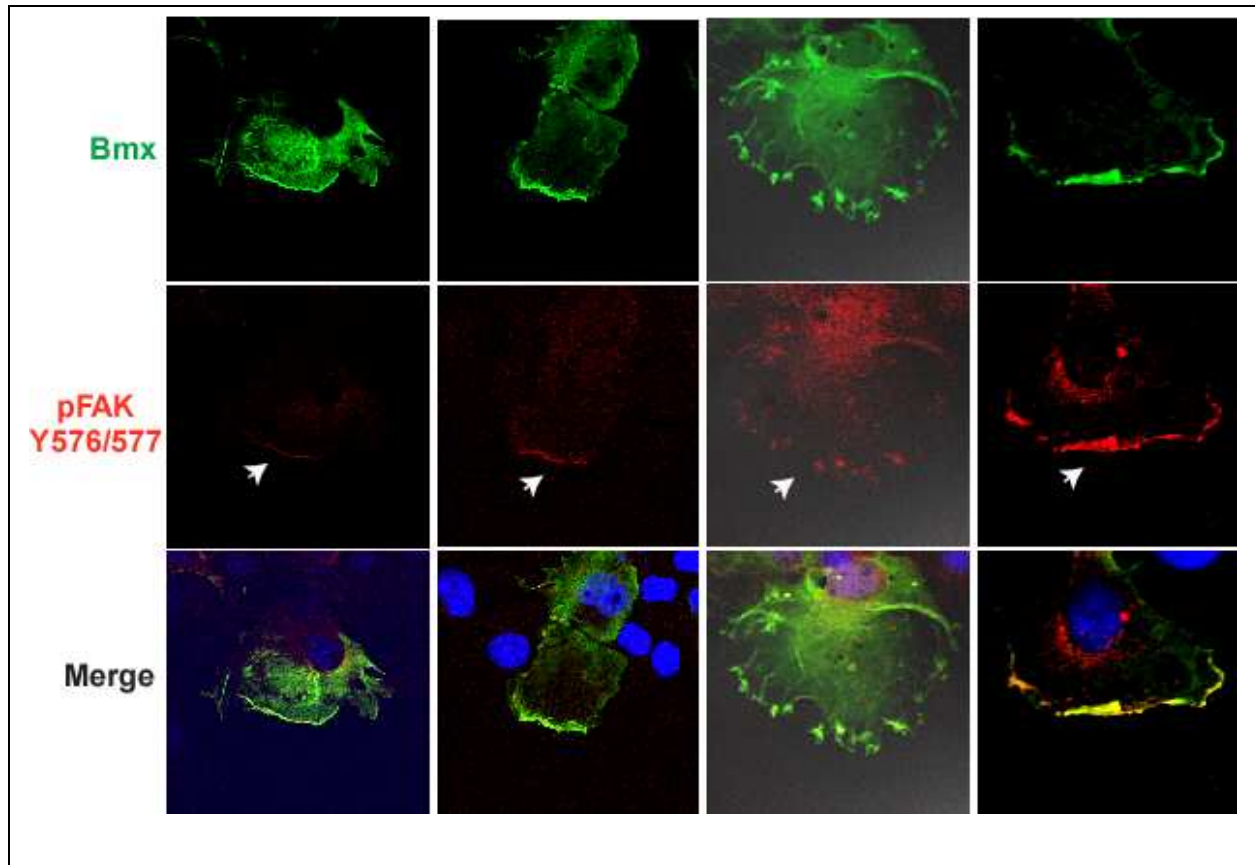

**Figure S5. Immunofluorescence for BMX and pTyr<sup>576/577</sup> FAK in BMX-transfected COS7 cells.**

COS7 cells were transiently transfected with wildtype BMX for two days. Scratch wounds were then introduced, and BMX and dual-phosphorylated FAK at Tyr<sup>576/577</sup> were assessed 3 hours later by immunofluorescence and confocal microscopy. Arrows in the middle panels indicate the leading edge.

**Figure S6**

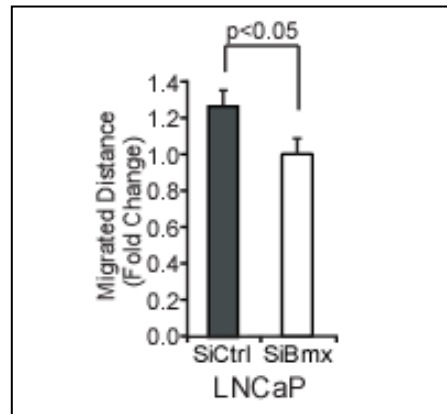

**Figure S6. BMX knockdown impairs wound healing in LNCaP cells.** Scratch wounds were introduced in LNCaP cells transfected with BMX-targeted or control siRNA, and light microscopy images were taken at 0 and 24 hours. The migrated distance was measured and normalized to the BMX -knockdown group. Data are means  $\pm$  SEM of three independent experiments.



**Table S1**

| A   | R   | N   | D   | C   | E   | Q   | G   | H   | I   | L   | K   | M   | F   | P   | S   | T   | W   | Y   | V   | *   |    |
|-----|-----|-----|-----|-----|-----|-----|-----|-----|-----|-----|-----|-----|-----|-----|-----|-----|-----|-----|-----|-----|----|
| 1   | 1.2 | 1.2 | 1.2 | 1   | 1.2 | 1.2 | 1.2 | 1.2 | 1   | 1   | 1   | 1   | 1   | 1.2 | 1.2 | 1.2 | 1   | 1.2 | 1   | 0.1 |    |
| 1   | 1.2 | 1.2 | 1.2 | 1   | 1.2 | 1.2 | 1.2 | 1.2 | 1   | 1   | 1   | 1   | 1   | 1.2 | 1.2 | 1.2 | 1   | 1.2 | 1   | 0.1 |    |
| 0.7 | 1.2 | 1.4 | 1.2 | 0.6 | 1   | 1.6 | 1.1 | 1   | 1.4 | 0.7 | 0.8 | 1.2 | 0.5 | 0.8 | 0.9 | 1   | 1   | 1.2 | 0.7 | 0.1 | -5 |
| 1   | 1.7 | 1.7 | 1.4 | 1.1 | 2.4 | 1.6 | 1.9 | 1   | 1   | 1   | 1.1 | 1.3 | 1   | 1.5 | 1.3 | 1.7 | 1.2 | 2.8 | 0.9 | 0.1 | -4 |
| 0.7 | 0.7 | 0.9 | 1   | 0.6 | 1.3 | 0.8 | 1.5 | 0.4 | 0.5 | 0.6 | 0.5 | 1   | 1   | 0.9 | 1   | 1.2 | 0.8 | 1.3 | 0.8 | 0.1 | -3 |
| 0.8 | 0.4 | 1.8 | 1.4 | 0.7 | 2.3 | 1.3 | 1.6 | 0.6 | 0.8 | 0.8 | 0.4 | 0.7 | 0.5 | 1.7 | 1.4 | 1.4 | 0.3 | 0.8 | 0.9 | 0.1 | -2 |
| 0.3 | 0.5 | 0.8 | 0.5 | 0.2 | 1.3 | 0.9 | 0.5 | 0.8 | 2.7 | 1.6 | 0.4 | 1   | 0.8 | 0.5 | 0.4 | 1.2 | 0.5 | 7.6 | 1.3 | 0.1 | -1 |
| 0   | 0   | 0   | 0   | 0   | 0   | 0   | 0   | 0   | 0   | 0   | 0   | 0   | 0   | 0   | 0   | 0   | 0   | 21  | 0   | 0   |    |
| 1.4 | 0.3 | 0.6 | 1   | 0.7 | 1.6 | 1.7 | 1.3 | 0.8 | 1   | 0.8 | 0.6 | 1.7 | 0.8 | 0.4 | 1.7 | 1.8 | 1.9 | 1.5 | 1.4 | 0.1 | +1 |
| 0.7 | 1.1 | 0.8 | 0.7 | 0.4 | 0.8 | 1   | 0.7 | 0.8 | 1   | 0.8 | 0.8 | 0.8 | 1.1 | 0.9 | 1   | 1.3 | 0.8 | 1.6 | 1.2 | 0.1 | +2 |
| 0.5 | 1.3 | 0.6 | 0.2 | 0.6 | 0.3 | 1   | 1.5 | 1.8 | 1.1 | 1.2 | 0.6 | 1.7 | 1.8 | 0.7 | 0.8 | 1.1 | 1.7 | 2.7 | 1.3 | 0.1 | +3 |
| 0.6 | 1.4 | 0.8 | 1   | 1.6 | 0.9 | 0.8 | 1.6 | 1.3 | 0.9 | 1   | 1   | 1.2 | 1   | 1   | 1   | 1.2 | 2   | 1.3 | 1.4 | 0.1 | +4 |
| 1   | 1.2 | 1.2 | 1.2 | 1   | 1.2 | 1.2 | 1.2 | 1   | 1   | 1   | 1   | 1   | 1   | 1.2 | 1.2 | 1.2 | 1   | 1.2 | 1   | 1   |    |
| 1   | 1.2 | 1.2 | 1.2 | 1   | 1.2 | 1.2 | 1.2 | 1   | 1   | 1   | 1   | 1   | 1   | 1.2 | 1.2 | 1.2 | 1   | 1.2 | 1   | 1   |    |
| 1   | 1.2 | 1.2 | 1.2 | 1   | 1.2 | 1.2 | 1.2 | 1   | 1   | 1   | 1   | 1   | 1   | 1.2 | 1.2 | 1.2 | 1   | 1.2 | 1   | 1   |    |

**Table S1. BMX matrix for pTyr at the -1 position.** The images from the positional peptide library assays were quantified. Each score represents the preference of BMX toward the fixed peptide in each well.

Table S2

| Name                      | Site      | Domain        | Sequence             |
|---------------------------|-----------|---------------|----------------------|
| <b>InsR Family</b>        |           |               |                      |
| InsR_Human                | 1189,1190 | Kinase domain | FGMTRDIYETDYYRKGGKGL |
| IGF1R_Human               | 1165,1166 | Kinase domain | FGMTRDIYETDYYRKGGKGL |
| <b>FGFR Family</b>        |           |               |                      |
| FGFR1_Human               | 653,654   | Kinase domain | RDHHIDYYKKTNG        |
| FGFR2_Human               | 656,657   | Kinase domain | RDINNIDYYKKTNGR      |
| FGFR3_Human               | 647,648   | Kinase domain | RDVHNLDDYYKKTNGR     |
| FGFR4_Human               | 642,643   | Kinase domain | RGVHHIDYYKKTNGR      |
| <b>Met Family/related</b> |           |               |                      |
| Met_Human                 | 1234,1235 | Kinase domain | FGLARDMYDKEYYSVHNKTG |
| RON_Human                 | 1238,1239 | Kinase domain | RDILDREYYSVQQHRH     |
| MER_Human                 | 753,754   | Kinase domain | FGLSKKIYSGDYYRQGRIAK |
| Axl_Human                 | 695,696   | Kinase domain | FGLSKKIYNGDYYRQGRIAK |
| Tyro3/SKY_Human           | 685,686   | Kinase domain | FGLSRKIYSGDYYRQGCASK |
| <b>Trk Family/related</b> |           |               |                      |
| TrkA_Human                | 680,681   | Kinase domain | FGMSRDIYSTDYYRVGGRT  |
| TrkB_Human                | 706,707   | Kinase domain | FGMSRDVYSTDYYRVGGHT  |
| TrkC_Human                | 709,710   | Kinase domain | FGMSRDVYSTDYYRFLNPS  |
| MuSK_Human                | 755,756   | Kinase domain | FGLSRNIYSADYYKANEND  |
| DDR2_Human                | 740,741   | Kinase domain | FGMSRNLYSGDYYRIQGRA  |
| DDR1_Human                | 796,797   | Kinase domain | FGMSRNLYAGDYYRVQGRAV |
| <b>FAK, Syk Family</b>    |           |               |                      |
| FAK_Human                 | 576,577   | Kinase domain | RYMEDSTYYKASKGK      |
| Pyk2_Human                | 579,580   | Kinase domain | RYIEDEDYYKASVTRL     |
| Syk_Human                 | 525,526   | Kinase domain | ALRADENYYKAQTHGK     |
| ZAP70_Human               | 429,493   | Kinase domain | ALGADDSYYTARSAGK     |
| <b>Jak Family/related</b> |           |               |                      |
| Jak1_Human                | 1034,1035 | Kinase domain | AIETDKEYYTVKDDR      |
| Jak2_Human                | 1007,1008 | Kinase domain | VLPQDKEYYKVKEPG      |
| Jak3_Human                | 980,981   | Kinase domain | LLPLDKDYYVVREPG      |
| Tyk2_Human                | 1054,1055 | Kinase domain | AVPEGHEYRVREDG       |
| <b>Src Family</b>         |           |               |                      |
| Fgr_Human                 | 208,209   | SH2domain     | RKLDMGGYYITTRVQ      |
| Fyn_Human                 | 213,214   | SH2domain     | RKLDNGGYYITTRAQF     |
| Yes_Human                 | 221,222   | SH2domain     | RKLDNGGYYITTRAQF     |
| Lyn_Human                 | 192,193   | SH2domain     | RSLDNGGYYISPRITF     |
| Blk_Human                 | 187,188   | SH2domain     | RCLDEGGYYISPRITF     |
| <b>ACK</b>                |           |               |                      |
| Ack_Human                 | 859,860   |               | KKVSSTHYLLPERP       |

**Table S2. List of proteins with dual tyrosine (pYpY) phosphorylation.** Data are based on mass spectrometry data in the PhosphoSite Plus database from Cell Signaling Technologies (<http://www.phosphosite.org>).
